# Supplementary material
Source: PubMed Central journal article supplement (PMC2702869)
Supplement: NIHMS54948-supplement-S_Table_1.pdf [file NIHMS54948-supplement-S_Table_1.pdf]

## Supplementary material

**Table 1.** Fold change increase in mRNA expression of angiogenic markers in Myc/VEGF mammary tumors, compared to Myc tumors.

| Angiogenic markers | Fold change   | p value |
|--------------------|---------------|---------|
| VEGF               | $2.5 \pm 0.7$ | 0.001   |
| Flk-1/ KDR         | $2.3 \pm 0.2$ | 0.001   |
| Flt-1              | $3.1 \pm 0.6$ | 0.001   |
| CD-31              | $2.4 \pm 0.9$ | 0.015   |
| VE-Cadherin        | $2.1 \pm 1.2$ | 0.036   |
