# Supplementary material
Source: PubMed Central journal article supplement (PMC2702869)
Supplement: NIHMS54948-supplement-S_Table_2.pdf [file NIHMS54948-supplement-S_Table_2.pdf]

## Supplementary material

**Table 2.** Characteristics of lung tumor metastases in Myc and Myc/VEGF mice.

|                                                                         | <b>Myc</b>                 | <b>Myc/VEGF</b>               |
|-------------------------------------------------------------------------|----------------------------|-------------------------------|
| Macroscopic Metastases+<br>( $<100 \mu\text{m}^2$ cross sectional area) | 2/19 (10.5%)               | 8/18 (44.4%)*                 |
| Microscopic Metastases+<br>( $>100 \mu\text{m}^2$ cross sectional area) | 7/19 (37%)                 | 16/18 (88.9%)**               |
| Average Total Area of Metastases++                                      | $1.65 \pm 2.1 \times 10^4$ | $3.93 \pm 2.8 \times 10^5$ ** |
| Total Number of Animals<br>with Metastases+                             | 8/19 (42%)                 | 16/18 (88.9%)****             |

+ Number of animals scoring positive/total animals in the group

++ Average cross sectional area in  $\mu\text{m}^2$

\* p value = 0.02

\*\* p value = 0.017

\*\*\* p value = .0006

\*\*\*\* p value = .0021
