# Supplementary material
Source: PubMed Central journal article supplement (PMC2702869)
Supplement: NIHMS54948-supplement-S_Table_3.pdf [file NIHMS54948-supplement-S_Table_3.pdf]

| <b>AVERAGE</b> | <b>stdv</b> | <b>SEM</b> | <b>Gene</b>  | <b>Description</b>                                                                                        |
|----------------|-------------|------------|--------------|-----------------------------------------------------------------------------------------------------------|
| 2,49875        | 1,91114859  | 0,95557429 | Scya11       | PA adhesion mono.chemot. Mm.4686 Small inducible cytokine A11                                             |
| 2,2005         | 1,13296381  | 0,56648191 | Thbs3        | PA adhesion thrombospondin 3 Mm.2114 Thrombospondin 3                                                     |
| 3,01975        | 0,44581489  | 0,22290745 | Bnip3        | PA apoptosis NIP3 Mm.2159 Mus musculus E1B 19K/Bcl-2-binding protein homolog (Nip3) mRNA nuclear gene end |
| 0,54           | 0,20474211  | 0,10237106 | Cdc2a        | PA cell cycle CDC2 Mm.4761 Cell division cycle control protein 2a                                         |
| 0,45           | 0,17028995  | 0,08514497 | Ccnb1-rs1    | PA cell cycle cyclin B Mm.22569 Cyclin B1 related sequence 1                                              |
| 2,127          | 0,51846054  | 0,25923027 | Ccnd1        | PA cell cycle cyclin D1 Mm.35804 Cyclin D1                                                                |
| 0,4595         | 0,09500351  | 0,04750175 |              | PA EmptyWell                                                                                              |
| 2,26033333     | 1,3103207   | 0,65516035 | Bmp1         | PA hormone/GF bone morph.1 Mm.27757 Bone morphogenetic protein 1                                          |
| 5,07475        | 4,2975377   | 2,14876885 | Col1a1       | PA hormone/GF growth/diff 1 Mm.22621 Procollagen type I alpha 1                                           |
| 1,922          | 0,33695005  | 0,16847502 | Ppp3ca       | PA modification calcineurin-cs Mm.293 Mouse calcineurin catalytic subunit mRNA complete cds               |
| 2,8635         | 0,54098953  | 0,27049476 | Klf5         | PA TF trans.elem.bind Mm.30262 ESTs Highly similar to ERYTHROID KRUEPPEL-LIKE TRANSCRIPTION FACTO         |
| 2,642          | 0,21702765  | 0,10851382 | Egln1        | UG3 EGL nine homolog 1 (C. elegans)                                                                       |
| 3,3165         | 1,91141562  | 0,95570781 |              | UG3 ESTs, Weakly similar to S61553 probable proteinase inhibitor wdm1 precursor - mouse [M.musculus]      |
| 1,00425        | 0,85036634  | 0,42518317 | AA986712     | UG3 expressed sequence AA986712                                                                           |
| 0,3975         | 0,1247571   | 0,06237855 | AW536573     | UG3 expressed sequence AW536573                                                                           |
| 1,37275        | 1,64394432  | 0,82197216 | H1fo-pending | UG3 H1 histone family, member O (oocyte-specific)                                                         |
| 2,423          | 0,17181967  | 0,08590984 | Hig1-pending | UG3 hypoxia induced gene 1                                                                                |
| 3,083          | 0,58195933  | 0,29097967 | Mrps18b      | UG3 Mrps18b                                                                                               |
| 2,635          | 0,5550045   | 0,27750225 |              | UG3 Mus musculus, clone IMAGE:3485144, mRNA                                                               |
| 0,52           | 0,19583922  | 0,09791961 |              | UG3 RIKEN cDNA 1300002E07 gene                                                                            |
| 0,66475        | 0,53202906  | 0,26601453 |              | UG3 RIKEN cDNA 5730454C12 gene                                                                            |
| 2,7025         | 0,97802573  | 0,48901287 |              | UG3 RIKEN cDNA 7420700M11 gene                                                                            |
| 0,7215         | 0,36414695  | 0,18207347 | Spry1        | UG3 sprouty homolog 1 (Drosophila)                                                                        |
| 0,8655         | 0,68335959  | 0,3416798  | Snd1-pending | UG3 staphylococcal nuclease domain containing 1                                                           |
| 2,392          | 0,79701129  | 0,39850565 | Hpcl-pending | UG5 2-hydroxyphytanoyl-CoA lyase                                                                          |
| 0,5065         | 0,22059087  | 0,11029544 | Phgdh        | UG5 3-phosphoglycerate dehydrogenase                                                                      |
| 0,40175        | 0,13158109  | 0,06579055 | Phgdh        | UG5 3-phosphoglycerate dehydrogenase                                                                      |
| 3,748          | 1,46970133  | 0,73485067 | Adam8        | UG5 a disintegrin and metalloproteinase domain 8                                                          |
| 3,446          | 2,48057991  | 1,24028995 | Adam12       | UG5 a disintegrin and metalloproteinase domain 12 (meltrin alpha)                                         |
| 2,247          | 1,25235857  | 0,62617929 | Adam19       | UG5 a disintegrin and metalloproteinase domain 19 (meltrin beta)                                          |
| 1,9555         | 0,76691308  | 0,38345654 | Adam19       | UG5 a disintegrin and metalloproteinase domain 19 (meltrin beta)                                          |

|            |            |            |              |                                                                                               |
|------------|------------|------------|--------------|-----------------------------------------------------------------------------------------------|
| 2,01125    | 0,41122611 | 0,20561306 | Adam9        | UG5 a disintegrin and metalloproteinase domain 9 (meltrin gamma)                              |
| 0,336      | 0,20108373 | 0,10054187 | Acas2        | UG5 acetyl-Coenzyme A synthetase 2                                                            |
| 0,4955     | 0,0678061  | 0,03390305 | Aco1         | UG5 aconitase 1                                                                               |
| 2,114      | 0,18899383 | 0,09449691 | Arpc5        | UG5 actin related protein 2/3 complex, subunit 5 (165 kDa)                                    |
| 1,7565     | 0,83092298 | 0,41546149 | Actn1        | UG5 actinin, alpha 1                                                                          |
| 1,7415     | 0,90108916 | 0,45054458 | Adcy7        | UG5 adenylate cyclase 7                                                                       |
| 0,38125    | 0,21759653 | 0,10879827 | Akl3l-pendin | UG5 adenylate kinase 3 alpha like                                                             |
| 2,30775    | 0,32967598 | 0,16483799 | Cap1         | UG5 adenylyl cyclase-associated CAP protein homolog 1 (S. cerevisiae, S. pombe)               |
| 0,4915     | 0,08228609 | 0,04114304 | Adprt1       | UG5 ADP-ribosyltransferase (NAD+; poly (ADP-ribose) polymerase) 1                             |
| 0,4875     | 0,24576479 | 0,1228824  | Akp2         | UG5 alkaline phosphatase 2, liver                                                             |
| 0,697      | 0,39781989 | 0,19890995 | Akp2         | UG5 alkaline phosphatase 2, liver                                                             |
| 2,46025    | 0,4192377  | 0,20961885 | App          | UG5 amyloid beta (A4) precursor protein                                                       |
| 1,8635     | 0,60428553 | 0,30214276 | Aplp1        | UG5 amyloid beta (A4) precursor-like protein 1                                                |
| 1,8525     | 0,72238009 | 0,36119005 | Aplp2        | UG5 amyloid beta (A4) precursor-like protein 2                                                |
| 0,43       | 0,23046764 | 0,11523382 | Als2         | UG5 amyotrophic lateral sclerosis 2 (juvenile) homolog (human)                                |
| 2,221      | 0,67837502 | 0,33918751 | Amotl2       | UG5 angiominin like 2                                                                         |
| 1,947      | 0,83006265 | 0,41503132 | Agtrl1       | UG5 angiotensin receptor-like 1                                                               |
| 6,22675    | 1,01743841 | 0,5087192  | Anxa2        | UG5 annexin A2                                                                                |
| 3,89425    | 0,70178077 | 0,35089039 | Anxa3        | UG5 annexin A3                                                                                |
| 2,08925    | 0,1380323  | 0,06901615 | Anxa5        | UG5 annexin A5                                                                                |
| 1,69675    | 1,05205398 | 0,52602699 | Apaf1        | UG5 apoptotic protease activating factor 1                                                    |
| 0,58675    | 0,14001042 | 0,07000521 | Apex         | UG5 apurinic/apurimidinic endonuclease                                                        |
| 1,7045     | 0,73846801 | 0,369234   | Aqp1         | UG5 aquaporin 1                                                                               |
| 2,518      | 0,73712188 | 0,36856094 | Ahr          | UG5 aryl-hydrocarbon receptor                                                                 |
| 0,195      | 0,09681942 | 0,04840971 | Asns         | UG5 asparagine synthetase                                                                     |
| 0,48566667 | 0,02809508 | 0,01404754 | Atp5g1       | UG5 ATP synthase, H+ transporting, mitochondrial F0 complex, subunit c (subunit 9), isoform 1 |
| 0,542      | 0,07406754 | 0,03703377 | Atp5g2       | UG5 ATP synthase, H+ transporting, mitochondrial F0 complex, subunit c (subunit 9), isoform 2 |
| 3,344      | 2,22353382 | 1,11176691 | Atp2a1       | UG5 ATPase, Ca++ transporting, cardiac muscle, fast twitch 1                                  |
| 0,44125    | 0,031106   | 0,015553   | Abcb6        | UG5 ATP-binding cassette, sub-family B (MDR/TAP), member 6                                    |
| 0,58225    | 0,30936104 | 0,15468052 | Abcg2        | UG5 ATP-binding cassette, sub-family G (WHITE), member 2                                      |
| 3,209      | 1,1608003  | 0,58040015 | Axin2        | UG5 axin2                                                                                     |
| 4,60075    | 2,02567756 | 1,01283878 | Axl          | UG5 AXL receptor tyrosine kinase                                                              |
| 0,51825    | 0,05372383 | 0,02686192 | Bcap37       | UG5 B-cell receptor-associated protein 37                                                     |

|            |            |            |        |                                                            |
|------------|------------|------------|--------|------------------------------------------------------------|
| 2,43       | 0,43449741 | 0,21724871 | Bnip2  | UG5 BCL2/adenovirus E1B 19 kDa-interacting protein 1, NIP2 |
| 3,39625    | 0,67598736 | 0,33799368 | Bnip3  | UG5 BCL2/adenovirus E1B 19 kDa-interacting protein 1, NIP3 |
| 1,905      | 0,48774379 | 0,24387189 | Biklk  | UG5 Bcl2-interacting killer-like                           |
| 1,59725    | 0,67938078 | 0,33969039 | Bok    | UG5 Bcl-2-related ovarian killer protein                   |
| 2,91125    | 0,54183415 | 0,27091708 | B2m    | UG5 beta-2 microglobulin                                   |
| 3,809      | 1,6093624  | 0,8046812  | Btrc   | UG5 beta-transducin repeat containing protein              |
| 2,62575    | 1,79393559 | 0,8969678  | Bicc1  | UG5 bicaudal C homolog 1 (Drosophila)                      |
| 4,528      | 2,8354032  | 1,4177016  | Bgn    | UG5 biglycan                                               |
| 3,713      | 1,67178168 | 0,83589084 | Bgn    | UG5 biglycan                                               |
| 3,39525    | 1,61745281 | 0,8087264  | Bmp1   | UG5 bone morphogenetic protein 1                           |
| 2,92775    | 1,64149208 | 0,82074604 | Bmp1   | UG5 bone morphogenetic protein 1                           |
| 2,43325    | 1,25478614 | 0,62739307 | Basp1  | UG5 brain abundant, membrane attached signal protein 1     |
| 0,45525    | 0,09492585 | 0,04746292 | Bcat2  | UG5 branched chain aminotransferase 2, mitochondrial       |
| 0,475      | 0,21794189 | 0,10897094 | Bckdk  | UG5 branched chain ketoacid dehydrogenase kinase           |
| 2,62575    | 1,34240714 | 0,67120357 | Bcar3  | UG5 breast cancer anti-estrogen resistance 3               |
| 2,467      | 0,54283147 | 0,27141573 | Bcar3  | UG5 breast cancer anti-estrogen resistance 3               |
| 1,8965     | 0,92168306 | 0,46084153 | Cdh13  | UG5 cadherin 13                                            |
| 2,05175    | 1,03965808 | 0,51982904 | Cdh3   | UG5 cadherin 3                                             |
| 2,80575    | 1,35837829 | 0,67918915 | Cast   | UG5 calpastatin                                            |
| 2,88625    | 1,31298804 | 0,65649402 | Cnn2   | UG5 calponin 2                                             |
| 2,10525    | 0,47017683 | 0,23508841 | Cnn2   | UG5 calponin 2                                             |
| 2,1985     | 0,9416859  | 0,47084295 | Chst2  | UG5 carbohydrate sulfotransferase 2                        |
| 0,04925    | 0,02979234 | 0,01489617 | Car6   | UG5 carbonic anhydrase 6                                   |
| 0,42666667 | 0,16059992 | 0,08029996 | Cals1  | UG5 carbonic anhydrase-like sequence 1                     |
| 4,4375     | 1,09587362 | 0,54793681 | Cpe    | UG5 carboxypeptidase E                                     |
| 2,748      | 1,62810073 | 0,81405037 | Cpxm1  | UG5 carboxypeptidase X 1 (M14 family)                      |
| 2,331      | 0,25531288 | 0,12765644 | Catna1 | UG5 catenin alpha 1                                        |
| 2,08425    | 0,22426082 | 0,11213041 | Ctsc   | UG5 cathepsin C                                            |
| 3,0705     | 2,02418782 | 1,01209391 | Ctsl   | UG5 cathepsin L                                            |
| 3,367      | 1,74367486 | 0,87183743 | Ctss   | UG5 cathepsin S                                            |
| 4,889      | 2,88361914 | 1,44180957 | Cav    | UG5 caveolin, caveolae protein, 22 kDa                     |
| 3,804      | 2,13749027 | 1,06874514 | Cav    | UG5 caveolin, caveolae protein, 22 kDa                     |
| 2,6175     | 0,66387624 | 0,33193812 | Cd36   | UG5 CD36 antigen                                           |

|         |            |            |              |                                                             |
|---------|------------|------------|--------------|-------------------------------------------------------------|
| 3,1895  | 0,35596489 | 0,17798244 | Cd44         | UG5 CD44 antigen                                            |
| 2,077   | 0,14816657 | 0,07408329 | Cd53         | UG5 CD53 antigen                                            |
| 2,122   | 0,57249803 | 0,28624902 | Cd53         | UG5 CD53 antigen                                            |
| 1,88625 | 0,8517462  | 0,4258731  | AF155546     | UG5 cDNA sequence AF155546                                  |
| 0,34625 | 0,09666911 | 0,04833455 | Ceacam1      | UG5 CEA-related cell adhesion molecule 1                    |
| 0,42125 | 0,16424651 | 0,08212326 | Ceacam2      | UG5 CEA-related cell adhesion molecule 2                    |
| 0,581   | 0,22003636 | 0,11001818 | Cnbp         | UG5 cellular nucleic acid binding protein                   |
| 1,8805  | 0,1665683  | 0,08328415 | Cln2         | UG5 ceroid-lipofuscinosis, neuronal 2                       |
| 1,4735  | 0,79541289 | 0,39770645 | Cntf         | UG5 ciliary neurotropic factor                              |
| 0,5075  | 0,2552835  | 0,12764175 | Cldn2        | UG5 claudin 2                                               |
| 4,34575 | 0,85256021 | 0,42628011 | Clp-pending  | UG5 coactosin-like protein                                  |
| 2,403   | 1,4946266  | 0,7473133  | C1r          | UG5 complement component 1, r subcomponent                  |
| 1,52825 | 0,79567094 | 0,39783547 | C1r          | UG5 complement component 1, r subcomponent                  |
| 2,7965  | 1,83759272 | 0,91879636 | C2           | UG5 complement component 2 (within H-2S)                    |
| 3,87    | 2,56043837 | 1,28021919 | Cfh          | UG5 complement component factor h                           |
| 1,9035  | 0,36098246 | 0,18049123 | Coro1a       | UG5 coronin, actin binding protein 1A                       |
| 0,448   | 0,03676955 | 0,01838478 | Arpp19-pendi | UG5 cyclic AMP phosphoprotein, 19 kDa                       |
| 2,63525 | 1,15765492 | 0,57882746 | Ccnd2        | UG5 cyclin D2                                               |
| 3,48575 | 0,57065306 | 0,28532653 | Ccng         | UG5 cyclin G                                                |
| 2,5635  | 0,67240935 | 0,33620467 | Ccng         | UG5 cyclin G                                                |
| 2,647   | 0,58433552 | 0,29216776 | Cdkn1a       | UG5 cyclin-dependent kinase inhibitor 1A (P21)              |
| 3,8655  | 0,83439899 | 0,41719949 | Cstb         | UG5 cystatin B                                              |
| 2,73725 | 0,38570833 | 0,19285417 | Cst3         | UG5 cystatin C                                              |
| 2,50925 | 1,14695376 | 0,57347688 | Csrp2        | UG5 cysteine-rich protein 2                                 |
| 2,124   | 0,51429758 | 0,25714879 | Csrp3        | UG5 cysteine-rich protein 3                                 |
| 0,2145  | 0,12303252 | 0,06151626 | Cyp2f2       | UG5 cytochrome P450, 2f2                                    |
| 0,618   | 0,19375242 | 0,09687621 | Cct5         | UG5 chaperonin subunit 5 (epsilon)                          |
| 0,37    | 0,24413248 | 0,12206624 | Cspg5        | UG5 chondroitin sulfate proteoglycan 5                      |
| 0,478   | 0,17706872 | 0,08853436 | Cbx3         | UG5 chromobox homolog 3 (Drosophila HP1 gamma)              |
| 3,70575 | 0,73355817 | 0,36677908 | Cbx5         | UG5 chromobox homolog 5 (Drosophila HP1a)                   |
| 0,65075 | 0,33900184 | 0,16950092 | Dazap1       | UG5 DAZ associated protein 1                                |
| 2,49175 | 1,18307998 | 0,59153999 | Dapk2        | UG5 death-associated kinase 2                               |
| 0,4885  | 0,12677671 | 0,06338835 | Deaf1        | UG5 deformed epidermal autoregulatory factor 1 (Drosophila) |

|            |            |            |              |                                                                                    |
|------------|------------|------------|--------------|------------------------------------------------------------------------------------|
| 3,302      | 3,35703778 | 1,67851889 | Dpt          | UG5 dermatopontin                                                                  |
| 8,28475    | 3,96240166 | 1,98120083 | Dsc2         | UG5 desmocollin 2                                                                  |
| 2,81625    | 1,29877105 | 0,64938553 | Dkk3         | UG5 dickkopf homolog 3 ( <i>Xenopus laevis</i> )                                   |
| 2,4295     | 0,89501601 | 0,44750801 | Dpp4         | UG5 dipeptidylpeptidase 4                                                          |
| 2,8565     | 0,47446865 | 0,23723433 | D11Bwg1104e  | UG5 DNA segment, Chr 11, Brigham & Women's Genetics 1104 expressed                 |
| 1,994      | 0,37547747 | 0,18773874 | D11Moh34     | UG5 DNA segment, Chr 11, KL Mohlke 34                                              |
| 2,30575    | 1,20228848 | 0,60114424 | D11Wsu78e    | UG5 DNA segment, Chr 11, Wayne State University 78, expressed                      |
| 2,173      | 0,70658805 | 0,35329402 | D15Wsu77e    | UG5 DNA segment, Chr 15, Wayne State University 77, expressed                      |
| 2,03225    | 0,47427445 | 0,23713722 | D19Wsu162e   | UG5 DNA segment, Chr 19, Wayne State University 162, expressed                     |
| 2,09025    | 0,70116064 | 0,35058032 | D2ErtD120e   | UG5 DNA segment, Chr 2, ERATO Doi 120, expressed                                   |
| 0,456      | 0,11531117 | 0,05765559 | D7Wsu128e    | UG5 DNA segment, Chr 7, Wayne State University 128, expressed                      |
| 0,5255     | 0,12497066 | 0,06248533 | DXErtD793e   | UG5 DNA segment, Chr X, ERATO Doi 793, expressed                                   |
| 2,72675    | 0,93106547 | 0,46553274 | Dnajb1       | UG5 DnaJ (Hsp40) homolog, subfamily B, member 1                                    |
| 5,64375    | 5,20576804 | 2,60288402 | Dnajb12      | UG5 DnaJ (Hsp40) homolog, subfamily B, member 12                                   |
| 0,5315     | 0,22138127 | 0,11069063 | Dnahc11      | UG5 dynein, axon, heavy chain 11                                                   |
| 1,8305     | 0,30654472 | 0,15327236 | Dnclc1       | UG5 dynein, cytoplasmic, light chain 1                                             |
| 3,85125    | 1,47563373 | 0,73781687 | Dst          | UG5 dystonin                                                                       |
| 1,54025    | 0,65188873 | 0,32594437 | Ets1         | UG5 E26 avian leukemia oncogene 1, 5' domain                                       |
| 0,214      | 0,07733477 | 0,03866739 | Enc1         | UG5 ectodermal-neural cortex 1                                                     |
| 0,46375    | 0,32399833 | 0,16199916 | Enc1         | UG5 ectodermal-neural cortex 1                                                     |
| 0,19466667 | 0,04981298 | 0,02490649 | Enc1         | UG5 ectodermal-neural cortex 1                                                     |
| 0,23775    | 0,14203609 | 0,07101804 | Enc1         | UG5 ectodermal-neural cortex 1                                                     |
| 0,531      | 0,13718843 | 0,06859422 | Entpd5       | UG5 ectonucleoside triphosphate diphosphohydrolase 5                               |
| 0,46825    | 0,10053979 | 0,0502699  | Enpp5        | UG5 ectonucleotide pyrophosphatase/phosphodiesterase 5                             |
| 0,70125    | 0,4816066  | 0,2408033  | Enpp5        | UG5 ectonucleotide pyrophosphatase/phosphodiesterase 5                             |
| 2,334      | 0,19543968 | 0,09771984 | Egln3        | UG5 EGL nine homolog 3 ( <i>C. elegans</i> )                                       |
| 2,04425    | 0,80439227 | 0,40219613 | Elk3         | UG5 ELK3, member of ETS oncogene family                                            |
| 1,99275    | 0,96092989 | 0,48046494 | Emcn-pending | UG5 endomucin                                                                      |
| 0,50725    | 0,12973916 | 0,06486958 | Elmo1        | UG5 engulfment and cell motility 1, ced-12 homolog ( <i>C. elegans</i> )           |
| 2,3605     | 1,02974091 | 0,51487045 | Efemp2       | UG5 epidermal growth factor-containing fibulin-like extracellular matrix protein 2 |
| 1,8155     | 0,31223229 | 0,15611614 | Eplin-pendin | UG5 epithelial protein lost in neoplasm                                            |
| 3,5705     | 2,43529389 | 1,21764695 | Epb7.2       | UG5 erythrocyte protein band 7.2                                                   |
| 4,07       | 1,89656198 | 0,94828099 | AA175286     | UG5 EST AA175286                                                                   |

|            |            |            |          |                                                                                                          |
|------------|------------|------------|----------|----------------------------------------------------------------------------------------------------------|
| 3,79325    | 1,39252011 | 0,69626005 | AA175286 | UG5 EST AA175286                                                                                         |
| 0,39975    | 0,10960953 | 0,05480477 | AI426782 | UG5 EST AI426782                                                                                         |
| 0,711      | 0,3754828  | 0,1877414  | Ebag9    | UG5 estrogen receptor-binding fragment-associated gene 9                                                 |
| 4,193      | 3,94879847 | 1,97439923 |          | UG5 ESTs                                                                                                 |
| 3,80975    | 3,0529027  | 1,52645135 |          | UG5 ESTs                                                                                                 |
| 3,86675    | 2,13305389 | 1,06652695 |          | UG5 ESTs                                                                                                 |
| 3,62575    | 2,31817405 | 1,15908702 |          | UG5 ESTs                                                                                                 |
| 4,23975    | 1,01915075 | 0,50957537 |          | UG5 ESTs                                                                                                 |
| 3,95       | 1,33299087 | 0,66649544 |          | UG5 ESTs                                                                                                 |
| 2,61366667 | 1,49725426 | 0,74862713 |          | UG5 ESTs                                                                                                 |
| 2,23625    | 1,44016952 | 0,72008476 |          | UG5 ESTs                                                                                                 |
| 1,965      | 0,94049526 | 0,47024763 |          | UG5 ESTs                                                                                                 |
| 2,027      | 0,70409422 | 0,35204711 |          | UG5 ESTs                                                                                                 |
| 1,84575    | 0,34727931 | 0,17363965 |          | UG5 ESTs                                                                                                 |
| 2,2575     | 0,55878469 | 0,27939235 |          | UG5 ESTs                                                                                                 |
| 1,90225    | 0,8412409  | 0,42062045 |          | UG5 ESTs                                                                                                 |
| 1,8765     | 0,78369233 | 0,39184616 |          | UG5 ESTs                                                                                                 |
| 1,7515     | 0,67144893 | 0,33572447 |          | UG5 ESTs                                                                                                 |
| 2,03525    | 0,42861123 | 0,21430561 |          | UG5 ESTs                                                                                                 |
| 1,822      | 0,62783597 | 0,31391798 |          | UG5 ESTs                                                                                                 |
| 0,49275    | 0,11312346 | 0,05656173 |          | UG5 ESTs                                                                                                 |
| 0,61375    | 0,27426675 | 0,13713337 |          | UG5 ESTs                                                                                                 |
| 0,35       | 0,0301883  | 0,01509415 |          | UG5 ESTs                                                                                                 |
| 0,6515     | 0,27298901 | 0,13649451 |          | UG5 ESTs                                                                                                 |
| 0,392      | 0,09444928 | 0,04722464 |          | UG5 ESTs                                                                                                 |
| 28,4005    | 18,4126889 | 9,20634447 |          | UG5 ESTs, Highly similar to CYT3 MOUSE STEFIN 3 [M.musculus]                                             |
| 6,95566667 | 1,21263735 | 0,60631867 |          | UG5 ESTs, Highly similar to CYT3 MOUSE STEFIN 3 [M.musculus]                                             |
| 5,877      | 3,03167028 | 1,51583514 |          | UG5 ESTs, Highly similar to MAF2 MOUSE TRANSCRIPTION FACTOR MAF2 [M.musculus]                            |
| 0,538      | 0,25310077 | 0,12655039 |          | UG5 ESTs, Highly similar to SR68_HUMAN SIGNAL RECOGNITION PARTICLE 68 KDA PROTEIN (SRP68) [H.sapiens]    |
| 0,44       | 0,02007486 | 0,01003743 |          | UG5 ESTs, Highly similar to unknown [M.musculus]                                                         |
| 2,60975    | 0,97397206 | 0,48698603 |          | UG5 ESTs, Moderately similar to extracellular glycoprotein EMILIN-2 precursor [Homo sapiens] [H.sapiens] |
| 5,39725    | 1,97888325 | 0,98944162 |          | UG5 ESTs, Moderately similar to STEFIN 2 [M.musculus]                                                    |
| 4,42725    | 0,68007812 | 0,34003906 |          | UG5 ESTs, Moderately similar to TROPOMYOSIN 5, CYTOSKELETAL TYPE [M.musculus]                            |



|            |            |            |          |                                                                                                                          |
|------------|------------|------------|----------|--------------------------------------------------------------------------------------------------------------------------|
| 0,5475     | 0,10812493 | 0,05406246 |          | UG5 ESTs, Moderately similar to Y153_HUMAN HYPOTHETICAL PROTEIN KIAA0153 [H.sapiens]                                     |
| 2,20725    | 0,5199887  | 0,25999435 |          | UG5 ESTs, Weakly similar to ADP-ribosylation-like 4 [Mus musculus] [M.musculus]                                          |
| 0,6115     | 0,27340995 | 0,13670497 |          | UG5 ESTs, Weakly similar to GNMSLL retrovirus-related reverse transcriptase homolog - mouse retrotransposon [M.musculus] |
| 0,522      | 0,15994374 | 0,07997187 |          | UG5 ESTs, Weakly similar to I49636 DNA-binding protein - mouse [M.musculus]                                              |
| 1,70075    | 0,5844116  | 0,2922058  |          | UG5 ESTs, Weakly similar to LMA1 MOUSE LAMININ ALPHA-1 CHAIN PRECURSOR [M.musculus]                                      |
| 0,6025     | 0,25781324 | 0,12890662 |          | UG5 ESTs, Weakly similar to mucin [R.norvegicus]                                                                         |
| 1,37975    | 0,6736158  | 0,3368079  |          | UG5 ESTs, Weakly similar to T08805 hypothetical protein DKFZp586H2123.1 [H.sapiens]                                      |
| 1,9135     | 0,85369569 | 0,42684785 |          | UG5 ESTs, Weakly similar to T31511 hypothetical protein Y116A8C.9 - Caenorhabditis elegans [C.elegans]                   |
| 0,43575    | 0,06740116 | 0,03370058 |          | UG5 ESTs, Weakly similar to TYROSINE-PROTEIN KINASE JAK3 [M.musculus]                                                    |
| 3,63075    | 2,93806165 | 1,46903082 |          | UG5 ESTs, Weakly similar to YP89_CAEEL HYPOTHETICAL 21.5 KD PROTEIN C08B11.9 IN CHROMOSOME II (1)                        |
| 2,422      | 1,4198021  | 0,70990105 | EIG180   | UG5 ethanol induced gene product EIG180                                                                                  |
| 0,5215     | 0,23221613 | 0,11610807 | Eif2ak3  | UG5 eukaryotic translation initiation factor 2 alpha kinase 3                                                            |
| 0,46925    | 0,07718106 | 0,03859053 | Eif2ak3  | UG5 eukaryotic translation initiation factor 2 alpha kinase 3                                                            |
| 0,467      | 0,2389742  | 0,1194871  | Eif2s3x  | UG5 eukaryotic translation initiation factor 2, subunit 3, structural gene X-linked                                      |
| 0,5545     | 0,15287795 | 0,07643897 | Eif3     | UG5 eukaryotic translation initiation factor 3                                                                           |
| 2,37275    | 0,7014387  | 0,35071935 | Es2el    | UG5 expressed sequence 2 embryonic lethal                                                                                |
| 11,06475   | 2,28326628 | 1,14163314 | AA407888 | UG5 expressed sequence AA407888                                                                                          |
| 2,45266667 | 1,20651993 | 0,60325996 | AA408225 | UG5 expressed sequence AA408225                                                                                          |
| 1,6385     | 0,75569416 | 0,37784708 | AA408225 | UG5 expressed sequence AA408225                                                                                          |
| 10,37875   | 1,91928431 | 0,95964215 | AA589382 | UG5 expressed sequence AA589382                                                                                          |
| 0,302      | 0,1293445  | 0,06467225 | AA960140 | UG5 expressed sequence AA960140                                                                                          |
| 0,2715     | 0,09785874 | 0,04892937 | AA960140 | UG5 expressed sequence AA960140                                                                                          |
| 0,46625    | 0,07481254 | 0,03740627 | AA986363 | UG5 expressed sequence AA986363                                                                                          |
| 2,047      | 0,87536849 | 0,43768425 | AA986839 | UG5 expressed sequence AA986839                                                                                          |
| 2,86625    | 0,72394492 | 0,36197246 | AA987150 | UG5 expressed sequence AA987150                                                                                          |
| 1,85025    | 1,07607353 | 0,53803677 | AI173274 | UG5 expressed sequence AI173274                                                                                          |
| 2,01375    | 0,3796528  | 0,1898264  | AI182284 | UG5 expressed sequence AI182284                                                                                          |
| 2,1915     | 0,54895082 | 0,27447541 | AI195350 | UG5 expressed sequence AI195350                                                                                          |
| 2,4245     | 0,30431398 | 0,15215699 | AI255215 | UG5 expressed sequence AI255215                                                                                          |
| 3,25925    | 2,26136926 | 1,13068463 | AI413331 | UG5 expressed sequence AI413331                                                                                          |
| 3,4995     | 1,00640234 | 0,50320117 | AI415285 | UG5 expressed sequence AI415285                                                                                          |
| 2,225      | 0,38008508 | 0,19004254 | AI425999 | UG5 expressed sequence AI425999                                                                                          |
| 0,6235     | 0,22185506 | 0,11092753 | AI447493 | UG5 expressed sequence AI447493                                                                                          |

|            |            |            |          |                                 |
|------------|------------|------------|----------|---------------------------------|
| 0,4575     | 0,05761076 | 0,02880538 | AI463271 | UG5 expressed sequence AI463271 |
| 1,87775    | 0,45651533 | 0,22825767 | AI465155 | UG5 expressed sequence AI465155 |
| 1,872      | 0,67204067 | 0,33602034 | AI480836 | UG5 expressed sequence AI480836 |
| 2,31       | 1,5782296  | 0,7891148  | AI504062 | UG5 expressed sequence AI504062 |
| 2,74533333 | 0,73763564 | 0,36881782 | AI504489 | UG5 expressed sequence AI504489 |
| 1,73725    | 0,54524941 | 0,2726247  | AI528491 | UG5 expressed sequence AI528491 |
| 2,0055     | 0,32720483 | 0,16360241 | AI562151 | UG5 expressed sequence AI562151 |
| 1,78725    | 0,69027694 | 0,34513847 | AI646975 | UG5 expressed sequence AI646975 |
| 0,62925    | 0,27166324 | 0,13583162 | AI746547 | UG5 expressed sequence AI746547 |
| 2,4465     | 0,31813467 | 0,15906733 | AI788669 | UG5 expressed sequence AI788669 |
| 2,98625    | 0,72008998 | 0,36004499 | AI789751 | UG5 expressed sequence AI789751 |
| 3,93575    | 1,48457544 | 0,74228772 | AI790205 | UG5 expressed sequence AI790205 |
| 1,6935     | 1,04086583 | 0,52043291 | AI834976 | UG5 expressed sequence AI834976 |
| 0,19025    | 0,07791181 | 0,0389559  | AI848120 | UG5 expressed sequence AI848120 |
| 0,40675    | 0,36564954 | 0,18282477 | AI848120 | UG5 expressed sequence AI848120 |
| 0,38266667 | 0,0568712  | 0,0284356  | AI852992 | UG5 expressed sequence AI852992 |
| 2,8785     | 1,61736607 | 0,80868303 | AI893585 | UG5 expressed sequence AI893585 |
| 0,41       | 0,10611629 | 0,05305814 | AI987814 | UG5 expressed sequence AI987814 |
| 0,55425    | 0,17741547 | 0,08870774 | AL022800 | UG5 expressed sequence AL022800 |
| 1,79125    | 0,61148692 | 0,30574346 | AL024016 | UG5 expressed sequence AL024016 |
| 0,54075    | 0,08496813 | 0,04248407 | AU014939 | UG5 expressed sequence AU014939 |
| 0,469      | 0,07157746 | 0,03578873 | AU014939 | UG5 expressed sequence AU014939 |
| 2,34275    | 0,48404158 | 0,24202079 | AU016931 | UG5 expressed sequence AU016931 |
| 0,55625    | 0,15146039 | 0,0757302  | AU018702 | UG5 expressed sequence AU018702 |
| 0,59775    | 0,17063484 | 0,08531742 | AU020094 | UG5 expressed sequence AU020094 |
| 5,1825     | 1,62211909 | 0,81105954 | AU022870 | UG5 expressed sequence AU022870 |
| 1,81       | 0,71367219 | 0,3568361  | AU023433 | UG5 expressed sequence AU023433 |
| 2,14775    | 0,35217645 | 0,17608822 | AU024550 | UG5 expressed sequence AU024550 |
| 2,72925    | 1,01641244 | 0,50820622 | AU042434 | UG5 expressed sequence AU042434 |
| 2,118      | 0,805379   | 0,4026895  | AW046661 | UG5 expressed sequence AW046661 |
| 2,33775    | 0,91547014 | 0,45773507 | AW047581 | UG5 expressed sequence AW047581 |
| 2,86875    | 1,50808231 | 0,75404115 | AW060987 | UG5 expressed sequence AW060987 |
| 2,8665     | 0,91864121 | 0,4593206  | AW060987 | UG5 expressed sequence AW060987 |



|         |            |            |           |                                                      |
|---------|------------|------------|-----------|------------------------------------------------------|
| 2,0565  | 0,56393883 | 0,28196941 | AW122478  | UG5 expressed sequence AW122478                      |
| 0,54275 | 0,11276044 | 0,05638022 | AW124583  | UG5 expressed sequence AW124583                      |
| 3,867   | 1,792008   | 0,896004   | AW227548  | UG5 expressed sequence AW227548                      |
| 1,66575 | 1,01753964 | 0,50876982 | AW229038  | UG5 expressed sequence AW229038                      |
| 3,11575 | 1,36366794 | 0,68183397 | AW260363  | UG5 expressed sequence AW260363                      |
| 1,70325 | 0,77132629 | 0,38566315 | AW322500  | UG5 expressed sequence AW322500                      |
| 0,55325 | 0,22760986 | 0,11380493 | AW544865  | UG5 expressed sequence AW544865                      |
| 1,9625  | 0,30321225 | 0,15160612 | AW546137  | UG5 expressed sequence AW546137                      |
| 2,44575 | 0,69674834 | 0,34837417 | AW549277  | UG5 expressed sequence AW549277                      |
| 1,832   | 0,6769062  | 0,3384531  | AW550168  | UG5 expressed sequence AW550168                      |
| 1,88075 | 0,38755333 | 0,19377666 | AW909330  | UG5 expressed sequence AW909330                      |
| 2,68825 | 1,02171828 | 0,51085914 | C85344    | UG5 expressed sequence C85344                        |
| 0,504   | 0,09378344 | 0,04689172 | C86302    | UG5 expressed sequence C86302                        |
| 3,914   | 0,92234954 | 0,46117477 | X98550    | UG5 expressed sequence X98550                        |
| 1,71025 | 0,88193778 | 0,44096889 | Xlkd1     | UG5 extra cellular link domain-containing 1          |
| 9,73375 | 4,56408665 | 2,28204332 | Ecm1      | UG5 extracellular matrix protein 1                   |
| 11,457  | 2,03219176 | 1,01609588 | Ecm1      | UG5 extracellular matrix protein 1                   |
| 3,21075 | 2,06135382 | 1,03067691 | Expi      | UG5 extracellular proteinase inhibitor               |
| 0,547   | 0,17165081 | 0,0858254  | Faah      | UG5 fatty acid amide hydrolase                       |
| 2,179   | 0,80802764 | 0,40401382 | Fabp7     | UG5 fatty acid binding protein 7, brain              |
| 3,32875 | 0,47572147 | 0,23786073 | Fbxw4     | UG5 f-box and WD-40 domain protein 4                 |
| 2,34975 | 0,42084469 | 0,21042234 | Fcgr3     | UG5 Fc receptor, IgG, low affinity III               |
| 0,365   | 0,06505382 | 0,03252691 | Fem1b     | UG5 feminization 1 homolog b (C. elegans)            |
| 3,27725 | 1,16829088 | 0,58414544 | Fgfbp1    | UG5 fibroblast growth factor binding protein 1       |
| 2,36925 | 1,19102515 | 0,59551258 | Fmod      | UG5 fibromodulin                                     |
| 6,8205  | 2,8723878  | 1,4361939  | Fn1       | UG5 fibronectin 1                                    |
| 3,47325 | 1,04464839 | 0,52232419 | LOC192176 | UG5 filamin-like protein                             |
| 3,2015  | 0,61088269 | 0,30544135 | LOC192176 | UG5 filamin-like protein                             |
| 8,5785  | 7,55605411 | 3,77802705 | Fstl      | UG5 follistatin-like                                 |
| 1,88975 | 0,95849165 | 0,47924583 | Fhl1      | UG5 four and a half LIM domains 1                    |
| 1,83375 | 0,40045089 | 0,20022545 | Fts       | UG5 fused toes                                       |
| 2,1975  | 0,45504688 | 0,22752344 | Fxyd5     | UG5 FXYD domain-containing ion transport regulator 5 |
| 2,198   | 0,52459762 | 0,26229881 | Gprk5     | UG5 G protein-coupled receptor kinase 5              |

|            |            |            |              |                                                                        |
|------------|------------|------------|--------------|------------------------------------------------------------------------|
| 1,92275    | 0,51614622 | 0,25807311 | Gata2        | UG5 GATA binding protein 2                                             |
| 1,8175     | 1,18236613 | 0,59118307 | Gcn5l1       | UG5 general control of amino acid synthesis-like 1 (yeast)             |
| 0,52125    | 0,12641565 | 0,06320783 | Gcs1         | UG5 glucosidase 1                                                      |
| 19,5575    | 6,45404362 | 3,22702181 | Gsta4        | UG5 glutathione S-transferase, alpha 4                                 |
| 0,38025    | 0,10127315 | 0,05063657 | Gdc1         | UG5 glycerol phosphate dehydrogenase 1, cytoplasmic adult              |
| 0,529      | 0,2234353  | 0,11171765 | Gatm         | UG5 glycine amidinotransferase (L-arginine:glycine amidinotransferase) |
| 2,87725    | 0,53914276 | 0,26957138 | Gp49a        | UG5 glycoprotein 49 A                                                  |
| 2,44975    | 1,26705679 | 0,6335284  | Ggta1        | UG5 glycoprotein galactosyltransferase alpha 1, 3                      |
| 15,89325   | 5,57726978 | 2,78863489 | Glycam1      | UG5 glycosylation dependent cell adhesion molecule 1                   |
| 2,617      | 1,77222365 | 0,88611183 | Gpc3         | UG5 glypican 3                                                         |
| 2,25366667 | 0,54712004 | 0,27356002 | Gpc3         | UG5 glypican 3                                                         |
| 0,528      | 0,16686322 | 0,08343161 | Golph3       | UG5 golgi phosphoprotein 3                                             |
| 4,64975    | 4,13469946 | 2,06734973 | Gzmf         | UG5 granzyme F                                                         |
| 0,43275    | 0,169254   | 0,084627   | Hspa9a       | UG5 heat shock protein, 74 kDa, A                                      |
| 0,556      | 0,29145726 | 0,14572863 | Hspa9a       | UG5 heat shock protein, 74 kDa, A                                      |
| 0,56125    | 0,21675697 | 0,10837848 | Hebp1        | UG5 heme binding protein 1                                             |
| 2,43575    | 1,30069709 | 0,65034854 | Hba          | UG5 hemoglobin alpha chain complex                                     |
| 1,86375    | 0,37175653 | 0,18587826 | Hs3st1       | UG5 heparan sulfate (glucosamine) 3-O-sulfotransferase 1               |
| 2,145      | 0,64006718 | 0,32003359 | Hmga1        | UG5 high mobility group AT-hook 1                                      |
| 3,72525    | 1,53997952 | 0,76998976 | H2-Aa        | UG5 histocompatibility 2, class II antigen A, alpha                    |
| 3,15875    | 0,96225512 | 0,48112756 | H2-Ab1       | UG5 histocompatibility 2, class II antigen A, beta 1                   |
| 3,24075    | 2,16162275 | 1,08081138 | H2-Bf        | UG5 histocompatibility 2, complement component factor B                |
| 2,10525    | 1,58989337 | 0,79494668 | H2-Bf        | UG5 histocompatibility 2, complement component factor B                |
| 0,44475    | 0,27320856 | 0,13660428 | Homer2-pendi | UG5 homer, neuronal immediate early gene, 2                            |
| 0,50475    | 0,07671321 | 0,03835661 | Hsd17b10     | UG5 hydroxysteroid (17-beta) dehydrogenase 10                          |
| 0,474      | 0,1088822  | 0,0544411  | MGC6279      | UG5 hypothetical protein MGC6279                                       |
| 4,7935     | 2,72115496 | 1,36057748 | Igh-1        | UG5 immunoglobulin heavy chain 1 (serum IgG2a)                         |
| 1,85933333 | 0,44621333 | 0,22310666 | Islr         | UG5 immunoglobulin superfamily containing leucine-rich repeat          |
| 3,98125    | 1,53859923 | 0,76929961 | Ihh          | UG5 Indian hedgehog homolog, (Drosophila)                              |
| 2,2165     | 0,50253126 | 0,25126563 | Irs1         | UG5 insulin receptor substrate 1                                       |
| 3,268      | 1,01085904 | 0,50542952 | Igfbp3       | UG5 insulin-like growth factor binding protein 3                       |
| 2,609      | 0,51228378 | 0,25614189 | Itga3        | UG5 integrin alpha 3                                                   |
| 2,57775    | 0,74562116 | 0,37281058 | Itgam        | UG5 integrin alpha M                                                   |

|            |            |            |         |                                                                       |
|------------|------------|------------|---------|-----------------------------------------------------------------------|
| 3,59675    | 1,48165839 | 0,74082919 | lfi203  | UG5 interferon activated gene 203                                     |
| 1,91175    | 1,07003937 | 0,53501968 | lsgf3g  | UG5 interferon dependent positive acting transcription factor 3 gamma |
| 0,3995     | 0,19558885 | 0,09779443 | lfrd2   | UG5 interferon-related developmental regulator 2                      |
| 2,68175    | 1,5156467  | 0,75782335 | ll1r1   | UG5 interleukin 1 receptor, type I                                    |
| 2,46875    | 0,66770072 | 0,33385036 | ll4ra   | UG5 interleukin 4 receptor, alpha                                     |
| 2,868      | 1,09721982 | 0,54860991 | Klk8    | UG5 kallikrein 8                                                      |
| 2,178      | 0,54969507 | 0,27484753 | Kpna1   | UG5 karyopherin (importin) alpha 1                                    |
| 7,14175    | 2,97492996 | 1,48746498 | Krt1-13 | UG5 keratin complex 1, acidic, gene 13                                |
| 9,33825    | 1,51998188 | 0,75999094 | Krt1-19 | UG5 keratin complex 1, acidic, gene 19                                |
| 2,08       | 0,54557248 | 0,27278624 | Krt2-19 | UG5 keratin complex 2, basic, gene 19                                 |
| 2,71225    | 0,37004628 | 0,18502314 | Krt2-4  | UG5 keratin complex 2, basic, gene 4                                  |
| 23,52625   | 5,85362289 | 2,92681144 | Krt2-6a | UG5 keratin complex 2, basic, gene 6a                                 |
| 8,702      | 8,78734738 | 4,39367369 | Krtdap  | UG5 keratinocyte differentiation associated protein                   |
| 3,42525    | 0,7695719  | 0,38478595 | Kif4    | UG5 kinesin heavy chain member 4                                      |
| 0,488      | 0,14515509 | 0,07257754 | Klf15   | UG5 Kruppel-like factor 15                                            |
| 3,85925    | 0,41193719 | 0,2059686  | Klf5    | UG5 Kruppel-like factor 5                                             |
| 0,496      | 0,18360102 | 0,09180051 | Klf9    | UG5 Kruppel-like factor 9                                             |
| 9,7385     | 2,93799177 | 1,46899589 | Ltf     | UG5 lactotransferrin                                                  |
| 2,3995     | 0,26591916 | 0,13295958 | Lad1    | UG5 ladinin                                                           |
| 1,815      | 0,33530484 | 0,16765242 | Lmna    | UG5 laminin A                                                         |
| 3,597      | 1,51800373 | 0,75900187 | Lamc1   | UG5 laminin, gamma 1                                                  |
| 1,91825    | 0,44427272 | 0,22213636 | Lamc1   | UG5 laminin, gamma 1                                                  |
| 10,6575    | 2,37331309 | 1,18665654 | Lamc2   | UG5 laminin, gamma 2                                                  |
| 9,506      | 4,47252777 | 2,23626389 | Lamc2   | UG5 laminin, gamma 2                                                  |
| 3,41275    | 1,6123526  | 0,8061763  | Lgals3  | UG5 lectin, galactose binding, soluble 3                              |
| 1,83166667 | 0,551277   | 0,2756385  | Lgmn    | UG5 legumain                                                          |
| 1,7765     | 0,83159626 | 0,41579813 | Lepre1  | UG5 leprecan 1                                                        |
| 0,43875    | 0,0634895  | 0,03174475 | Lag     | UG5 leukemia-associated gene                                          |
| 0,86625    | 0,70479518 | 0,35239759 | Lcn2    | UG5 lipocalin 2                                                       |
| 1,97925    | 0,50835511 | 0,25417755 | Lbp     | UG5 lipopolysaccharide binding protein                                |
| 7,232      | 6,22622352 | 3,11311176 | Lum     | UG5 lumican                                                           |

|            |            |            |              |                                                                                                                        |
|------------|------------|------------|--------------|------------------------------------------------------------------------------------------------------------------------|
| 6,37375    | 1,11805318 | 0,55902659 | Ly6a         | UG5 lymphocyte antigen 6 complex, locus A                                                                              |
| 1,66875    | 0,82346721 | 0,41173361 | Ly6a         | UG5 lymphocyte antigen 6 complex, locus A                                                                              |
| 4,64166667 | 2,31303488 | 1,15651744 | Ly6c         | UG5 lymphocyte antigen 6 complex, locus C                                                                              |
| 5,93925    | 2,90668108 | 1,45334054 | Ly6d         | UG5 lymphocyte antigen 6 complex, locus D                                                                              |
| 0,22825    | 0,098912   | 0,049456   | Lorsdh       | UG5 lysine oxoglutarate reductase, saccharopine dehydrogenase                                                          |
| 2,15425    | 0,43214687 | 0,21607343 | Lamp1        | UG5 lysosomal membrane glycoprotein 1                                                                                  |
| 5,799      | 5,46892232 | 2,73446116 | Lox          | UG5 lysyl oxidase                                                                                                      |
| 2,69325    | 2,06717446 | 1,03358723 | Mgl          | UG5 macrophage galactose N-acetyl-galactosamine specific lectin                                                        |
| 0,5465     | 0,16644218 | 0,08322109 | Mgl          | UG5 macrophage galactose N-acetyl-galactosamine specific lectin                                                        |
| 2,825      | 0,4283262  | 0,2141631  | Mkrn3        | UG5 makorin, ring finger protein, 3                                                                                    |
| 0,6095     | 0,28465242 | 0,14232621 | Mor2         | UG5 malate dehydrogenase, soluble                                                                                      |
| 0,464      | 0,12100138 | 0,06050069 | Mfng         | UG5 manic fringe homolog (Drosophila)                                                                                  |
| 1,82725    | 0,54868775 | 0,27434388 | Man1a        | UG5 mannosidase 1, alpha                                                                                               |
| 2,4615     | 0,77498624 | 0,38749312 | Man2a1       | UG5 mannosidase 2, alpha 1                                                                                             |
| 1,7255     | 1,02284228 | 0,51142114 | Meg3         | UG5 maternally expressed gene 3                                                                                        |
| 5,2315     | 4,86907264 | 2,43453632 | Mmp2         | UG5 matrix metalloproteinase 2                                                                                         |
| 2,23725    | 1,02501394 | 0,51250697 | Mmp23        | UG5 matrix metalloproteinase 23                                                                                        |
| 1,847      | 0,33255776 | 0,16627888 | Mta111       | UG5 metastasis associated 1-like 1                                                                                     |
| 2,066      | 0,31512431 | 0,15756216 | Mbd2         | UG5 methyl-CpG binding domain protein 2                                                                                |
| 0,28175    | 0,09962722 | 0,04981361 | Mthfd2       | UG5 methylenetetrahydrofolate dehydrogenase (NAD+ dependent), methenyltetrahydrofolate cyclohydrolase                  |
| 6,20075    | 5,25492552 | 2,62746276 | Mfap5-pendin | UG5 microfibrillar associated protein 5                                                                                |
| 1,7735     | 0,71598254 | 0,35799127 | Mtap4        | UG5 microtubule-associated protein 4                                                                                   |
| 0,45625    | 0,09029719 | 0,0451486  | Mcmd2        | UG5 mini chromosome maintenance deficient 2 (S. cerevisiae)                                                            |
| 0,44775    | 0,03756217 | 0,01878109 | Mcmd5        | UG5 mini chromosome maintenance deficient 5 (S. cerevisiae)                                                            |
| 0,44975    | 0,09727067 | 0,04863534 | Mcmd6        | UG5 mini chromosome maintenance deficient 6 (S. cerevisiae)                                                            |
| 0,42       | 0,10625441 | 0,05312721 | Mrpl15       | UG5 mitochondrial ribosomal protein L15                                                                                |
| 0,52625    | 0,1015     | 0,05075    | Mrpl53       | UG5 mitochondrial ribosomal protein L53                                                                                |
| 2,41075    | 0,53854147 | 0,26927074 | Mapk6        | UG5 mitogen-activated protein kinase 6                                                                                 |
| 0,63525    | 0,28799117 | 0,14399559 | Mg29         | UG5 mitsugumin 29                                                                                                      |
| 4,32875    | 1,12004088 | 0,56002044 | M32486       | UG5 Mouse 19.5 mRNA                                                                                                    |
| 0,17725    | 0,08035494 | 0,04017747 |              | UG5 Mus musculus 10 day old male pancreas cDNA, RIKEN full-length enriched library, clone:1810073D20:synaptor          |
| 4,30475    | 1,94176747 | 0,97088374 |              | UG5 Mus musculus adult male testis cDNA, RIKEN full-length enriched library, clone:4930471K13:homolog to HYPO sequence |

|         |            |            |                                                                                                                                |
|---------|------------|------------|--------------------------------------------------------------------------------------------------------------------------------|
| 0,469   | 0,10500794 | 0,05250397 | UG5 Mus musculus clone 1-17 unknown mRNA                                                                                       |
| 2,5345  | 1,26504453 | 0,63252227 | UG5 Mus musculus germline imuunoglobulin gamma constant region (IgG3) mRNA                                                     |
| 1,7115  | 0,97644952 | 0,48822476 | UG5 Mus musculus NC8 mRNA, complete cds                                                                                        |
| 0,52125 | 0,05662964 | 0,02831482 | UG5 Mus musculus neural stem cell derived neuronal survival protein precursor (Sdnf) mRNA, complete cds                        |
| 0,6095  | 0,17461672 | 0,08730836 | UG5 Mus musculus, clone IMAGE:3154023, mRNA                                                                                    |
| 2,277   | 0,49076607 | 0,24538303 | UG5 Mus musculus, clone IMAGE:3154539, mRNA, partial cds                                                                       |
| 0,53275 | 0,081692   | 0,040846   | UG5 Mus musculus, clone IMAGE:3485208, mRNA, partial cds                                                                       |
| 7,049   | 4,29241641 | 2,14620821 | UG5 Mus musculus, clone IMAGE:3590081, mRNA, partial cds                                                                       |
| 0,411   | 0,10221872 | 0,05110936 | UG5 Mus musculus, clone IMAGE:3708215, mRNA                                                                                    |
| 0,454   | 0,1591582  | 0,0795791  | UG5 Mus musculus, clone IMAGE:4948091, mRNA, partial cds                                                                       |
| 2,13125 | 0,18919368 | 0,09459684 | UG5 Mus musculus, clone IMAGE:5342828, mRNA, partial cds                                                                       |
| 2,137   | 0,41297538 | 0,20648769 | UG5 Mus musculus, clone MGC:11703 IMAGE:3964527, mRNA, complete cds                                                            |
| 0,684   | 0,40601724 | 0,20300862 | UG5 Mus musculus, clone MGC:12151 IMAGE:3711012, mRNA, complete cds                                                            |
| 0,51525 | 0,1368512  | 0,0684256  | UG5 Mus musculus, clone MGC:18985 IMAGE:4011674, mRNA, complete cds                                                            |
| 1,343   | 0,78811632 | 0,39405816 | UG5 Mus musculus, clone MGC:19209 IMAGE:4238526, mRNA, complete cds                                                            |
| 0,64475 | 0,29243959 | 0,1462198  | UG5 Mus musculus, clone MGC:31031 IMAGE:5137689, mRNA, complete cds                                                            |
| 0,609   | 0,2276591  | 0,11382955 | UG5 Mus musculus, clone MGC:32469 IMAGE:5050433, mRNA, complete cds                                                            |
| 0,5955  | 0,19458075 | 0,09729037 | UG5 Mus musculus, clone MGC:32469 IMAGE:5050433, mRNA, complete cds                                                            |
| 3,64775 | 1,81406732 | 0,90703366 | UG5 Mus musculus, clone MGC:37810 IMAGE:5098241, mRNA, complete cds                                                            |
| 3,96575 | 1,33154456 | 0,66577228 | UG5 Mus musculus, clone MGC:37810 IMAGE:5098241, mRNA, complete cds                                                            |
| 0,4415  | 0,2595952  | 0,1297976  | UG5 Mus musculus, clone MGC:38363 IMAGE:5344986, mRNA, complete cds                                                            |
| 1,88575 | 0,89687583 | 0,44843791 | UG5 Mus musculus, clone MGC:8070 IMAGE:3587770, mRNA, complete cds                                                             |
| 0,435   | 0,12480652 | 0,06240326 | UG5 Mus musculus, Similar to Acetyl-Co A acetyltransferase 1, mitochondrial, clone MGC:39067 IMAGE:5365469, mRNA, complete cds |
| 2,09175 | 0,62040276 | 0,31020138 | UG5 Mus musculus, Similar to aladin, clone MGC:25579 IMAGE:3994248, mRNA, complete cds                                         |
| 2,99275 | 1,34903209 | 0,67451605 | UG5 Mus musculus, Similar to carboxylesterase 2 (intestine, liver), clone MGC:18908 IMAGE:4241028, mRNA, complete cds          |
| 4,575   | 2,9197227  | 1,45986135 | UG5 Mus musculus, Similar to complement component 1, s subcomponent, clone MGC:19094 IMAGE:4196654, mRNA, complete cds         |
| 2,365   | 1,03522172 | 0,51761086 | UG5 Mus musculus, Similar to cytoskeleton-associated protein 4, clone IMAGE:5322388, mRNA, partial cds                         |
| 3,978   | 2,8766185  | 1,43830925 | UG5 Mus musculus, Similar to DKFZP586L2024 protein, clone IMAGE:4982180, mRNA, partial cds                                     |
| 0,57975 | 0,18145592 | 0,09072796 | UG5 Mus musculus, Similar to hypothetical protein BC014916, clone MGC:36399 IMAGE:5135570, mRNA, complete cds                  |
| 2,291   | 0,61911927 | 0,30955963 | UG5 Mus musculus, Similar to hypothetical protein FLJ10350, clone MGC:27585 IMAGE:4489521, mRNA, complete cds                  |
| 2,00325 | 0,39931473 | 0,19965736 | UG5 Mus musculus, Similar to hypothetical protein FLJ13213, clone MGC:28555 IMAGE:4206928, mRNA, complete cds                  |
| 2,818   | 0,41774075 | 0,20887037 | UG5 Mus musculus, Similar to inositol 1,3,4-triphosphate 5/6 kinase, clone IMAGE:5026869, mRNA, partial cds                    |
| 2,10025 | 0,26994861 | 0,1349743  | UG5 Mus musculus, Similar to KIAA0922 protein, clone IMAGE:4935316, mRNA, partial cds                                          |

|            |            |            |              |                                                                                                                  |
|------------|------------|------------|--------------|------------------------------------------------------------------------------------------------------------------|
| 2,1035     | 0,98373862 | 0,49186931 |              | UG5 Mus musculus, Similar to peroxisomal biogenesis factor 16, clone MGC:19145 IMAGE:4218547, mRNA, complete cds |
| 0,64725    | 0,28371391 | 0,14185696 |              | UG5 Mus musculus, Similar to phosphoserine aminotransferase, clone MGC:6462 IMAGE:2616298, mRNA, complete cds    |
| 0,3475     | 0,08340064 | 0,04170032 |              | UG5 Mus musculus, similar to putative, clone MGC:37604 IMAGE:4989150, mRNA, complete cds                         |
| 3,82925    | 2,70292698 | 1,35146349 |              | UG5 Mus musculus, Similar to RIKEN cDNA 0610007L05 gene, clone MGC:18838 IMAGE:4212222, mRNA, complete cds       |
| 0,60275    | 0,18771854 | 0,09385927 |              | UG5 Mus musculus, Similar to xylulokinase homolog (H. influenzae), clone IMAGE:5043428, mRNA, partial cds        |
| 4,16025    | 2,50513864 | 1,25256932 | Mal          | UG5 myelin and lymphocyte protein, T-cell differentiation protein                                                |
| 0,34366667 | 0,09239769 | 0,04619885 | Myb          | UG5 myeloblastosis oncogene                                                                                      |
| 0,11225    | 0,02459505 | 0,01229753 | Myc          | UG5 myelocytomatosis oncogene                                                                                    |
| 2,59725    | 0,38115559 | 0,19057779 | Mcl1         | UG5 myeloid cell leukemia sequence 1                                                                             |
| 0,47833333 | 0,09473296 | 0,04736648 | Mpo          | UG5 myeloperoxidase                                                                                              |
| 2,6865     | 0,52843448 | 0,26421724 | Myln         | UG5 myosin light chain, alkali, nonmuscle                                                                        |
| 0,39875    | 0,13235401 | 0,066177   | Myh8         | UG5 myosin, heavy polypeptide 8, skeletal muscle, perinatal                                                      |
| 4,76275    | 1,36630508 | 0,68315254 | Macs         | UG5 myristoylated alanine rich protein kinase C substrate                                                        |
| 4,43825    | 0,87109256 | 0,43554628 | Macs         | UG5 myristoylated alanine rich protein kinase C substrate                                                        |
| 3,2465     | 1,32641384 | 0,66320692 | Macs         | UG5 myristoylated alanine rich protein kinase C substrate                                                        |
| 0,454      | 0,16285986 | 0,08142993 | Ndufb9       | UG5 NADH dehydrogenase (ubiquinone) 1 beta subcomplex, 9                                                         |
| 2,27625    | 0,29396301 | 0,1469815  | Net1         | UG5 neuroepithelial cell transforming gene 1                                                                     |
| 2,05575    | 0,36800849 | 0,18400425 | Nte-pending  | UG5 neuropathy target esterase                                                                                   |
| 2,11025    | 0,77077899 | 0,38538949 | Nrp          | UG5 neuropilin                                                                                                   |
| 2,04075    | 0,8185619  | 0,40928095 | Nrp          | UG5 neuropilin                                                                                                   |
| 2,66875    | 1,90662186 | 0,95331093 | Nid1         | UG5 nidogen 1                                                                                                    |
| 1,89825    | 0,24205698 | 0,12102849 | Notch1       | UG5 Notch gene homolog 1, (Drosophila)                                                                           |
| 2,8855     | 1,33306026 | 0,66653013 | Nrarp        | UG5 Notch-regulated ankyrin repeat protein                                                                       |
| 1,902      | 0,20568584 | 0,10284292 | Gs2na-pendin | UG5 nuclear autoantigen                                                                                          |
| 0,55266667 | 0,10257843 | 0,05128921 | Nfib         | UG5 nuclear factor I/B                                                                                           |
| 2,627      | 0,85461375 | 0,42730688 | Nfat5        | UG5 nuclear factor of activated T-cells 5                                                                        |
| 2,10825    | 0,60525057 | 0,30262528 | Nfkbia       | UG5 nuclear factor of kappa light chain gene enhancer in B-cells inhibitor, alpha                                |
| 0,4835     | 0,20642109 | 0,10321055 | Nr4a1        | UG5 nuclear receptor subfamily 4, group A, member 1                                                              |
| 0,31875    | 0,07156524 | 0,03578262 | Nr4a1        | UG5 nuclear receptor subfamily 4, group A, member 1                                                              |
| 2,44925    | 0,34783461 | 0,17391731 | Nfe2l2       | UG5 nuclear, factor, erythroid derived 2, like 2                                                                 |
| 3,26825    | 2,49743967 | 1,24871984 | onzin        | UG5 onzin                                                                                                        |
| 4,476      | 2,62385937 | 1,31192969 | Osf2-pending | UG5 osteoblast specific factor 2 (fasciclin I-like)                                                              |
| 1,691      | 0,60057028 | 0,30028514 | Pak1         | UG5 p21 (CDKN1A)-activated kinase 1                                                                              |



|         |            |            |         |                                                                                               |
|---------|------------|------------|---------|-----------------------------------------------------------------------------------------------|
| 1,73625 | 0,53786081 | 0,2689304  | Plunc   | UG5 palate, lung, and nasal epithelium expressed transcript                                   |
| 2,3825  | 1,59026151 | 0,79513075 | Ptx3    | UG5 pentaxin related gene                                                                     |
| 2,04875 | 1,44397469 | 0,72198735 | Ppic    | UG5 peptidylprolyl isomerase C                                                                |
| 2,1975  | 0,51124978 | 0,25562489 | Prph1   | UG5 peripherin 1                                                                              |
| 0,45975 | 0,18817789 | 0,09408894 | Prdx3   | UG5 peroxiredoxin 3                                                                           |
| 2,49375 | 0,78816935 | 0,39408467 | Prdx6   | UG5 peroxiredoxin 6                                                                           |
| 0,47625 | 0,18532741 | 0,09266371 | Pex11b  | UG5 peroxisomal biogenesis factor 11b                                                         |
| 2,53675 | 1,67326734 | 0,83663367 | Pdgfra  | UG5 platelet derived growth factor receptor, alpha polypeptide                                |
| 2,04875 | 0,41099098 | 0,20549549 | Pdgfa   | UG5 platelet derived growth factor, alpha                                                     |
| 2,8655  | 1,72176276 | 0,86088138 | Pf4     | UG5 platelet factor 4                                                                         |
| 1,93775 | 1,00801269 | 0,50400635 | Plek2   | UG5 pleckstrin 2                                                                              |
| 1,87    | 0,63076039 | 0,31538019 | Pkd2    | UG5 polycystic kidney disease 2                                                               |
| 1,74625 | 0,7170204  | 0,3585102  | Pkd2    | UG5 polycystic kidney disease 2                                                               |
| 0,4095  | 0,0920163  | 0,04600815 | Kcnn4   | UG5 potassium intermediate/small conductance calcium-activated channel, subfamily N, member 4 |
| 4,30575 | 1,76322004 | 0,88161002 | Prnp    | UG5 prion protein                                                                             |
| 12,7735 | 6,90007229 | 3,45003615 | Col3a1  | UG5 procollagen, type III, alpha 1                                                            |
| 4,83125 | 3,51454183 | 1,75727091 | Col3a1  | UG5 procollagen, type III, alpha 1                                                            |
| 2,701   | 1,80917587 | 0,90458794 | Col5a1  | UG5 procollagen, type V, alpha 1                                                              |
| 6,56725 | 3,75231105 | 1,87615553 | Col5a2  | UG5 procollagen, type V, alpha 2                                                              |
| 6,06    | 2,9168955  | 1,45844775 | Col5a2  | UG5 procollagen, type V, alpha 2                                                              |
| 3,62775 | 1,92427239 | 0,9621362  | Col5a2  | UG5 procollagen, type V, alpha 2                                                              |
| 3,295   | 2,15985123 | 1,07992561 | Col6a1  | <i>UG5 procollagen, type VI, alpha 1</i>                                                      |
| 2,3805  | 1,18741021 | 0,5937051  | Col6a1  | UG5 procollagen, type VI, alpha 1                                                             |
| 2,473   | 0,65324676 | 0,32662338 | Col6a3  | UG5 procollagen, type VI, alpha 3                                                             |
| 4,489   | 3,41273429 | 1,70636714 | Col11a1 | UG5 procollagen, type XI, alpha 1                                                             |
| 2,2895  | 1,54948432 | 0,77474216 | Col14a1 | UG5 procollagen, type XIV, alpha 1                                                            |
| 7,91825 | 3,0987301  | 1,54936505 | Ppbp    | UG5 pro-platelet basic protein                                                                |
| 2,53225 | 1,32672815 | 0,66336407 | Pcsk5   | UG5 proprotein convertase subtilisin/kexin type 5                                             |
| 2,21725 | 1,33357249 | 0,66678624 | Ptges   | UG5 prostaglandin E synthase                                                                  |
| 6,44    | 5,11977057 | 2,55988528 | Psca    | UG5 prostate stem cell antigen                                                                |
| 0,432   | 0,07359801 | 0,036799   | Prss25  | UG5 protease, serine, 25                                                                      |
| 2,17575 | 0,25437816 | 0,12718908 | Psmd1   | UG5 proteasome (prosome, macropain) 26S subunit, non-ATPase, 1                                |
| 2,2845  | 0,53978051 | 0,26989026 | Ppp3ca  | UG5 protein phosphatase 3, catalytic subunit, alpha isoform                                   |

|         |            |            |         |                                                                                           |
|---------|------------|------------|---------|-------------------------------------------------------------------------------------------|
| 2,55725 | 1,01314901 | 0,50657451 | Pros1   | UG5 protein S (alpha)                                                                     |
| 1,8115  | 0,8082613  | 0,40413065 | Ptpn16  | UG5 protein tyrosine phosphatase, non-receptor type 16                                    |
| 0,614   | 0,27413744 | 0,13706872 | Ppfibp2 | UG5 protein tyrosine phosphatase, receptor-type, F interacting protein, binding protein 2 |
| 0,37475 | 0,11921514 | 0,05960757 | Pycs    | UG5 pyrroline-5-carboxylate synthetase (glutamate gamma-semialdehyde synthetase)          |
| 0,5995  | 0,15186288 | 0,07593144 | Pdha1   | UG5 pyruvate dehydrogenase E1 alpha 1                                                     |
| 1,8505  | 0,2749212  | 0,1374606  | Rab5a   | UG5 RAB5A, member RAS oncogene family                                                     |
| 0,49875 | 0,13312745 | 0,06656372 | Racgap1 | UG5 Rac GTPase-activating protein 1                                                       |
| 0,5045  | 0,03557621 | 0,0177881  | Rap1ga1 | UG5 Rap1, GTPase-activating protein 1                                                     |
| 0,50025 | 0,18842571 | 0,09421286 | Rap1ga1 | UG5 Rap1, GTPase-activating protein 1                                                     |
| 2,18375 | 0,55332171 | 0,27666086 | Rap2b   | UG5 RAP2B, member of RAS oncogene family                                                  |
| 0,46825 | 0,12631541 | 0,06315771 | Rassf3  | UG5 Ras association domain family 3 protein                                               |
| 1,77275 | 0,50455616 | 0,25227808 | Arhc    | UG5 ras homolog 9 (RhoC)                                                                  |
| 2,85775 | 1,27275302 | 0,63637651 | Rasa3   | UG5 RAS p21 protein activator 3                                                           |
| 2,224   | 0,79727996 | 0,39863998 | Rgs12   | UG5 regulator of G-protein signaling 12                                                   |
| 0,58825 | 0,15841375 | 0,07920688 | Rfc5    | UG5 replication factor C (activator 1) 5 (36.5 kDa)                                       |
| 3,66425 | 1,61474588 | 0,80737294 | Recc1   | UG5 replication factor C, 140 kDa                                                         |
| 2,046   | 0,40524067 | 0,20262033 | Rcn     | UG5 reticulocalbin                                                                        |
| 4,236   | 1,75031559 | 0,8751578  | Rbp1    | UG5 retinol binding protein 1, cellular                                                   |
| 1,89375 | 0,53736789 | 0,26868395 | Rbp2    | UG5 retinol binding protein 2, cellular                                                   |
| 0,592   | 0,20219957 | 0,10109979 | Arhgdig | UG5 Rho GDP dissociation inhibitor (GDI) gamma                                            |
| 2,9025  | 1,36188215 | 0,68094108 | Rnase4  | UG5 ribonuclease, RNase A family 4                                                        |
| 0,55325 | 0,10070543 | 0,05035271 | Rpl8    | UG5 ribosomal protein L8                                                                  |
| 2,59025 | 0,95545779 | 0,47772889 | Rps6ka4 | UG5 ribosomal protein S6 kinase, 90kD, polypeptide 4                                      |
| 1,87875 | 0,97873537 | 0,48936768 |         | UG5 RIKEN cDNA 0610006G05 gene                                                            |
| 0,50975 | 0,11848593 | 0,05924297 |         | UG5 RIKEN cDNA 0610006O14 gene                                                            |
| 0,4705  | 0,12952863 | 0,06476432 |         | UG5 RIKEN cDNA 0610010I13 gene                                                            |
| 0,7645  | 0,43030958 | 0,21515479 |         | UG5 RIKEN cDNA 0610012D09 gene                                                            |
| 0,48325 | 0,18670186 | 0,09335093 |         | UG5 RIKEN cDNA 0610015A08 gene                                                            |
| 0,466   | 0,13363009 | 0,06681504 |         | UG5 RIKEN cDNA 0610025I19 gene                                                            |
| 2,111   | 0,90377984 | 0,45188992 |         | UG5 RIKEN cDNA 0610039K22 gene                                                            |
| 11,4235 | 2,4940689  | 1,24703445 |         | UG5 RIKEN cDNA 1110013O05 gene                                                            |
| 10,338  | 1,81781205 | 0,90890603 |         | UG5 RIKEN cDNA 1110013O05 gene                                                            |
| 0,51975 | 0,05140931 | 0,02570465 |         | UG5 RIKEN cDNA 1110014L17 gene                                                            |

|            |            |            |                                |
|------------|------------|------------|--------------------------------|
| 0,50725    | 0,08689601 | 0,04344801 | UG5 RIKEN cDNA 1110014L17 gene |
| 1,95675    | 0,38778463 | 0,19389231 | UG5 RIKEN cDNA 1110019I14 gene |
| 3,181      | 1,67189912 | 0,83594956 | UG5 RIKEN cDNA 1110027O12 gene |
| 2,4285     | 0,76108716 | 0,38054358 | UG5 RIKEN cDNA 1110030J09 gene |
| 1,52125    | 0,87958792 | 0,43979396 | UG5 RIKEN cDNA 1110036H20 gene |
| 0,47225    | 0,08052898 | 0,04026449 | UG5 RIKEN cDNA 1110038I05 gene |
| 0,494      | 0,22782596 | 0,11391298 | UG5 RIKEN cDNA 1110054D16 gene |
| 1,647      | 0,7084763  | 0,35423815 | UG5 RIKEN cDNA 1110055J05 gene |
| 2,0835     | 0,450634   | 0,225317   | UG5 RIKEN cDNA 1110058E16 gene |
| 2,075      | 1,4448647  | 0,72243235 | UG5 RIKEN cDNA 1110065N12 gene |
| 2,14225    | 1,45242564 | 0,72621282 | UG5 RIKEN cDNA 1110065N12 gene |
| 1,80175    | 0,55264598 | 0,27632299 | UG5 RIKEN cDNA 1200015A22 gene |
| 0,392      | 0,19726801 | 0,098634   | UG5 RIKEN cDNA 1200016D23 gene |
| 0,49125    | 0,15748307 | 0,07874153 | UG5 RIKEN cDNA 1300006C06 gene |
| 2,17075    | 0,29644716 | 0,14822358 | UG5 RIKEN cDNA 1300011C24 gene |
| 2,633      | 1,19964272 | 0,59982136 | UG5 RIKEN cDNA 1300014I06 gene |
| 0,49225    | 0,26719079 | 0,13359539 | UG5 RIKEN cDNA 1600012P17 gene |
| 3,118      | 0,90684067 | 0,45342033 | UG5 RIKEN cDNA 1600013L13 gene |
| 2,2295     | 0,60789062 | 0,30394531 | UG5 RIKEN cDNA 1600013L13 gene |
| 1,90525    | 0,57566158 | 0,28783079 | UG5 RIKEN cDNA 1600019O04 gene |
| 0,477      | 0,05903107 | 0,02951553 | UG5 RIKEN cDNA 1700003F10 gene |
| 1,0555     | 0,88363737 | 0,44181868 | UG5 RIKEN cDNA 1700019D03 gene |
| 3,004      | 1,2571009  | 0,62855045 | UG5 RIKEN cDNA 1700020L11 gene |
| 0,429      | 0,11283912 | 0,05641956 | UG5 RIKEN cDNA 1700029F09 gene |
| 0,513      | 0,17380641 | 0,0869032  | UG5 RIKEN cDNA 1700040I03 gene |
| 0,53525    | 0,13214733 | 0,06607366 | UG5 RIKEN cDNA 1810004P07 gene |
| 1,83166667 | 0,449638   | 0,224819   | UG5 RIKEN cDNA 1810061M12 gene |
| 2,55175    | 1,01043798 | 0,50521899 | UG5 RIKEN cDNA 2210010N10 gene |
| 2,75075    | 1,18803546 | 0,59401773 | UG5 RIKEN cDNA 2210403K04 gene |
| 2,136      | 0,52881188 | 0,26440594 | UG5 RIKEN cDNA 2210412K09 gene |
| 3,55375    | 3,04581225 | 1,52290612 | UG5 RIKEN cDNA 2210415K03 gene |
| 3,4405     | 3,10035315 | 1,55017658 | UG5 RIKEN cDNA 2210415K03 gene |
| 3,05       | 0,91366332 | 0,45683166 | UG5 RIKEN cDNA 2310004I24 gene |

|            |            |            |                                |
|------------|------------|------------|--------------------------------|
| 3,4405     | 2,89237498 | 1,44618749 | UG5 RIKEN cDNA 2310008J16 gene |
| 2,5915     | 1,71022231 | 0,85511115 | UG5 RIKEN cDNA 2310008J16 gene |
| 2,07875    | 1,15612409 | 0,57806205 | UG5 RIKEN cDNA 2310008N12 gene |
| 1,946      | 0,99346498 | 0,49673249 | UG5 RIKEN cDNA 2310016E02 gene |
| 3,058      | 1,01997255 | 0,50998627 | UG5 RIKEN cDNA 2310046B19 gene |
| 2,085      | 1,30747237 | 0,65373619 | UG5 RIKEN cDNA 2310047A01 gene |
| 1,73225    | 0,51998934 | 0,25999467 | UG5 RIKEN cDNA 2310047A01 gene |
| 1,52625    | 0,94131623 | 0,47065812 | UG5 RIKEN cDNA 2310047A01 gene |
| 0,5215     | 0,15172453 | 0,07586227 | UG5 RIKEN cDNA 2310051E17 gene |
| 0,45675    | 0,05142227 | 0,02571114 | UG5 RIKEN cDNA 2310051E17 gene |
| 0,565      | 0,24111823 | 0,12055911 | UG5 RIKEN cDNA 2310057J16 gene |
| 0,53375    | 0,1693918  | 0,0846959  | UG5 RIKEN cDNA 2310058G22 gene |
| 6,46833333 | 1,80598625 | 0,90299312 | UG5 RIKEN cDNA 2310067G05 gene |
| 1,697      | 0,69282682 | 0,34641341 | UG5 RIKEN cDNA 2310067L16 gene |
| 4,04575    | 1,83976509 | 0,91988254 | UG5 RIKEN cDNA 2310075E07 gene |
| 0,46025    | 0,19169311 | 0,09584656 | UG5 RIKEN cDNA 2410015N17 gene |
| 1,7145     | 0,98116614 | 0,49058307 | UG5 RIKEN cDNA 2410088K19 gene |
| 2,09275    | 0,99817579 | 0,4990879  | UG5 RIKEN cDNA 2610001E17 gene |
| 0,6265     | 0,24487071 | 0,12243536 | UG5 RIKEN cDNA 2610009I02 gene |
| 0,3675     | 0,13755605 | 0,06877802 | UG5 RIKEN cDNA 2610018G03 gene |
| 3,0525     | 0,97166198 | 0,48583099 | UG5 RIKEN cDNA 2610019M19 gene |
| 0,4315     | 0,07550938 | 0,03775469 | UG5 RIKEN cDNA 2610024G14 gene |
| 0,23975    | 0,11103265 | 0,05551633 | UG5 RIKEN cDNA 2610028K12 gene |
| 0,38875    | 0,19058047 | 0,09529024 | UG5 RIKEN cDNA 2610524K04 gene |
| 1,79425    | 0,41422327 | 0,20711163 | UG5 RIKEN cDNA 2700038M07 gene |
| 0,482      | 0,10622617 | 0,05311309 | UG5 RIKEN cDNA 2700085E05 gene |
| 2,16225    | 1,43963708 | 0,71981854 | UG5 RIKEN cDNA 2810002E22 gene |
| 2,3345     | 0,28135683 | 0,14067842 | UG5 RIKEN cDNA 2810420C16 gene |
| 0,3015     | 0,09347192 | 0,04673596 | UG5 RIKEN cDNA 2810434B10 gene |
| 3,06425    | 0,84278877 | 0,42139439 | UG5 RIKEN cDNA 2810442I22 gene |
| 1,369      | 1,03079613 | 0,51539807 | UG5 RIKEN cDNA 2810480C08 gene |
| 0,51425    | 0,11261846 | 0,05630923 | UG5 RIKEN cDNA 3110001N18 gene |
| 0,36275    | 0,10990109 | 0,05495055 | UG5 RIKEN cDNA 3110001O07 gene |

|         |            |            |                                |
|---------|------------|------------|--------------------------------|
| 4,10675 | 0,76830262 | 0,38415131 | UG5 RIKEN cDNA 3110023F10 gene |
| 0,4795  | 0,1364539  | 0,06822695 | UG5 RIKEN cDNA 3110043J09 gene |
| 1,6535  | 0,4410461  | 0,22052305 | UG5 RIKEN cDNA 3110045G13 gene |
| 0,69325 | 0,32093133 | 0,16046566 | UG5 RIKEN cDNA 3110080J08 gene |
| 0,7325  | 0,45358167 | 0,22679084 | UG5 RIKEN cDNA 3830408P06 gene |
| 2,651   | 0,57159864 | 0,28579932 | UG5 RIKEN cDNA 4632401D06 gene |
| 0,57875 | 0,28012542 | 0,14006271 | UG5 RIKEN cDNA 4833422P03 gene |
| 2,01225 | 0,64038966 | 0,32019483 | UG5 RIKEN cDNA 4833439O17 gene |
| 1,95825 | 0,3741144  | 0,1870572  | UG5 RIKEN cDNA 4921504I16 gene |
| 2,0305  | 0,12403897 | 0,06201949 | UG5 RIKEN cDNA 4921510D23 gene |
| 0,44125 | 0,05055937 | 0,02527969 | UG5 RIKEN cDNA 4921532K09 gene |
| 0,477   | 0,1919427  | 0,09597135 | UG5 RIKEN cDNA 4930552N12 gene |
| 3,20425 | 0,30432918 | 0,15216459 | UG5 RIKEN cDNA 4930579A11 gene |
| 2,00025 | 0,63345212 | 0,31672606 | UG5 RIKEN cDNA 4931420H10 gene |
| 2,05875 | 0,53765192 | 0,26882596 | UG5 RIKEN cDNA 4933405K01 gene |
| 1,67025 | 0,67369547 | 0,33684773 | UG5 RIKEN cDNA 4933433P14 gene |
| 0,709   | 0,51530832 | 0,25765416 | UG5 RIKEN cDNA 4933436O18 gene |
| 0,6125  | 0,16184252 | 0,08092126 | UG5 RIKEN cDNA 5630400D21 gene |
| 2,544   | 0,21571432 | 0,10785716 | UG5 RIKEN cDNA 5730502D15 gene |
| 1,97975 | 0,86840942 | 0,43420471 | UG5 RIKEN cDNA 6030404E16 gene |
| 1,89475 | 0,91181591 | 0,45590795 | UG5 RIKEN cDNA 6330406I15 gene |
| 1,559   | 0,57867031 | 0,28933516 | UG5 RIKEN cDNA 6330406I15 gene |
| 2,00975 | 0,78949282 | 0,39474641 | UG5 RIKEN cDNA 6330407G11 gene |
| 2,0185  | 0,24660697 | 0,12330349 | UG5 RIKEN cDNA 8430404F20 gene |
| 2,3455  | 0,89327058 | 0,44663529 | UG5 RIKEN cDNA 8430436O14 gene |
| 2,54675 | 0,85623181 | 0,42811591 | UG5 RIKEN cDNA 9030607L17 gene |
| 1,789   | 0,62095786 | 0,31047893 | UG5 RIKEN cDNA 9130005N14 gene |
| 1,8575  | 0,87158419 | 0,43579209 | UG5 RIKEN cDNA 9130005N14 gene |
| 2,0585  | 0,74690673 | 0,37345337 | UG5 RIKEN cDNA 9230111I22 gene |
| 8,63775 | 1,5115161  | 0,75575805 | UG5 RIKEN cDNA 9230117N10 gene |
| 2,0145  | 0,65428918 | 0,32714459 | UG5 RIKEN cDNA 9430072K23 gene |
| 1,6255  | 0,59975245 | 0,29987622 | UG5 RIKEN cDNA B430305P08 gene |
| 0,431   | 0,19313381 | 0,0965669  | UG5 RIKEN cDNA C330026P08 gene |

|          |            |            |              |                                                                                     |
|----------|------------|------------|--------------|-------------------------------------------------------------------------------------|
| 2,244    | 0,60112617 | 0,30056308 | Rbms1        | UG5 RNA binding motif, single stranded interacting protein 1                        |
| 0,5365   | 0,11544263 | 0,05772131 | Rnac-pending | UG5 RNA cyclase homolog                                                             |
| 3,02975  | 1,03592901 | 0,51796451 | Runx1        | UG5 runt related transcription factor 1                                             |
| 6,54575  | 1,19186111 | 0,59593056 | S100a11      | UG5 S100 calcium binding protein A11 (calizzarin)                                   |
| 3,01825  | 0,95319021 | 0,47659511 | S100a3       | UG5 S100 calcium binding protein A3                                                 |
| 13,547   | 4,91628457 | 2,45814229 | S100a6       | UG5 S100 calcium binding protein A6 (calcyclin)                                     |
| 15,314   | 8,07704925 | 4,03852463 | S100a8       | UG5 S100 calcium binding protein A8 (calgranulin A)                                 |
| 1,00825  | 0,72809861 | 0,3640493  | Sfrp1        | UG5 secreted frizzled-related sequence protein 1                                    |
| 1,94775  | 1,02977097 | 0,51488548 | Smoc2        | UG5 secreted modular calcium binding protein 2                                      |
| 1,64175  | 0,91786868 | 0,45893434 | Smoc2        | UG5 secreted modular calcium binding protein 2                                      |
| 8,737    | 8,29081789 | 4,14540895 | Spp1         | UG5 secreted phosphoprotein 1                                                       |
| 0,55625  | 0,30161164 | 0,15080582 | Scgb3a2      | UG5 secretoglobin, family 3A, member 2                                              |
| 1,91375  | 0,61435406 | 0,30717703 | Serpnb2      | UG5 serine (or cysteine) proteinase inhibitor, clade B (ovalbumin), member 2        |
| 16,25    | 10,3511066 | 5,17555332 | Serpind1     | UG5 serine (or cysteine) proteinase inhibitor, clade D (heparin cofactor), member 1 |
| 0,49625  | 0,14087672 | 0,07043836 | Shmt1        | UG5 serine hydroxymethyl transferase 1 (soluble)                                    |
| 5,595    | 3,25123689 | 1,62561845 | Spi2-1       | UG5 serine protease inhibitor 2-1                                                   |
| 4,3205   | 2,62190688 | 1,31095344 | Spi2-1       | UG5 serine protease inhibitor 2-1                                                   |
| 2,4525   | 0,36620441 | 0,1831022  | Sh3bgrl3     | UG5 SH3 domain binding glutamic acid-rich protein-like 3                            |
| 2,20475  | 0,39179704 | 0,19589852 | Sh3d3        | UG5 SH3 domain protein 3                                                            |
| 2,0435   | 0,73515962 | 0,36757981 | Sh3glb1      | UG5 SH3-domain GRB2-like B1 (endophilin)                                            |
| 5,6085   | 4,54877907 | 2,27438953 | Siat5        | UG5 sialyltransferase 5                                                             |
| 0,44575  | 0,06184591 | 0,03092296 | Sfxn1        | UG5 sideroflexin 1                                                                  |
| 0,423    | 0,07915807 | 0,03957903 | Ssbp1        | UG5 single-stranded DNA binding protein 1                                           |
| 3,0065   | 2,12019079 | 1,0600954  | Slit3        | UG5 slit homolog 3 (Drosophila)                                                     |
| 2,78925  | 1,48412137 | 0,74206069 | Slit3        | UG5 slit homolog 3 (Drosophila)                                                     |
| 4,34775  | 2,0089512  | 1,0044756  | Scya6        | UG5 small inducible cytokine A6                                                     |
| 3,419    | 1,55097604 | 0,77548802 | Sprrl1       | UG5 small proline rich-like 1                                                       |
| 2,21925  | 0,53383042 | 0,26691521 | Sprrl7       | UG5 small proline rich-like 7                                                       |
| 13,88425 | 3,39178934 | 1,69589467 | Sprr1a       | UG5 small proline-rich protein 1A                                                   |
| 17,56725 | 10,7421785 | 5,37108923 | Sprr2a       | UG5 small proline-rich protein 2A                                                   |
| 0,4575   | 0,03664696 | 0,01832348 | Slc12a2      | UG5 solute carrier family 12, member 2                                              |
| 2,507    | 0,62037139 | 0,3101857  | Slc20a1      | UG5 solute carrier family 20, member 1                                              |
| 0,53425  | 0,23042334 | 0,11521167 | Slc29a1      | UG5 solute carrier family 29 (nucleoside transporters), member 1                    |



|            |            |            |              |                                                                                                       |
|------------|------------|------------|--------------|-------------------------------------------------------------------------------------------------------|
| 0,717      | 0,3016477  | 0,15082385 | Slc3a2       | UG5 solute carrier family 3 (activators of dibasic and neutral amino acid transport), member 2        |
| 2,95       | 2,54818354 | 1,27409177 | Slc4a1       | UG5 solute carrier family 4 (anion exchanger), member 1                                               |
| 0,42075    | 0,15618659 | 0,07809329 | Skp2         | UG5 S-phase kinase-associated protein 2 (p45)                                                         |
| 5,3895     | 0,36028553 | 0,18014277 | Sgpl1        | UG5 sphingosine phosphate lyase 1                                                                     |
| 2,13       | 0,37967969 | 0,18983984 | Sgpl1        | UG5 sphingosine phosphate lyase 1                                                                     |
| 3,999      | 1,11062145 | 0,55531072 | Stra6        | UG5 stimulated by retinoic acid gene 6                                                                |
| 2,69675    | 0,60981165 | 0,30490583 | Stra6        | UG5 stimulated by retinoic acid gene 6                                                                |
| 0,423      | 0,14995777 | 0,07497889 | Smarcd2      | UG5 SWI/SNF related, matrix associated, actin dependent regulator of chromatin, subfamily d, member 2 |
| 0,5435     | 0,15830035 | 0,07915017 | Sycp3        | UG5 synaptonemal complex protein 3                                                                    |
| 2,17825    | 1,03701475 | 0,51850737 | Stx7         | UG5 syntaxin 7                                                                                        |
| 2,667      | 0,94838881 | 0,4741944  | Stx7         | UG5 syntaxin 7                                                                                        |
| 2,5205     | 0,66014367 | 0,33007184 | Stx8         | UG5 syntaxin 8                                                                                        |
| 5,59033333 | 4,68467185 | 2,34233592 | Tnc          | UG5 tenascin C                                                                                        |
| 0,56925    | 0,15469621 | 0,0773481  | Txn2         | UG5 thioredoxin 2                                                                                     |
| 4,21725    | 2,82934178 | 1,41467089 | Thbs2        | UG5 thrombospondin 2                                                                                  |
| 2,008      | 0,59449867 | 0,29724933 | Thy1         | UG5 thymus cell antigen 1, theta                                                                      |
| 0,63375    | 0,22708644 | 0,11354322 | TOB3         | UG5 TOB3                                                                                              |
| 0,35525    | 0,26028494 | 0,13014247 | Ttpa         | UG5 tocopherol (alpha) transfer protein                                                               |
| 0,563      | 0,09765586 | 0,04882793 | Tob2         | UG5 transducer of ERBB2, 2                                                                            |
| 0,5015     | 0,20368685 | 0,10184343 | Tob1         | UG5 transducer of ErbB-2.1                                                                            |
| 4,83475    | 2,44414407 | 1,22207204 | Tgfb1        | UG5 transforming growth factor, beta induced, 68 kDa                                                  |
| 0,58275    | 0,13585869 | 0,06792934 | Timm8a       | UG5 translocase of inner mitochondrial membrane 8 homolog a (yeast)                                   |
| 1,88925    | 0,82950764 | 0,41475382 | Timm17a      | UG5 translocator of inner mitochondrial membrane 17 kDa, a                                            |
| 2,456      | 0,25901158 | 0,12950579 | Tm7sf1       | UG5 transmembrane 7 superfamily member 1                                                              |
| 3,1115     | 1,11560163 | 0,55780082 | Trim29       | UG5 tripartite motif protein 29                                                                       |
| 2,7545     | 0,60024134 | 0,30012067 | Trim29       | UG5 tripartite motif protein 29                                                                       |
| 1,83075    | 0,77078504 | 0,38539252 | Tncs         | UG5 troponin C, fast skeletal                                                                         |
| 1,94075    | 0,84759518 | 0,42379759 | Tem1-pending | UG5 tumor endothelial marker 1 precursor                                                              |
| 1,28425    | 0,81585226 | 0,40792613 | Tnfrsf19     | UG5 tumor necrosis factor receptor superfamily, member 19                                             |
| 2,21       | 0,77547706 | 0,38773853 | Tnfaip2      | UG5 tumor necrosis factor, alpha-induced protein 2                                                    |
| 2,87425    | 2,05711519 | 1,0285576  | Tacstd2      | UG5 tumor-associated calcium signal transducer 2                                                      |
| 4,02675    | 1,94062952 | 0,97031476 | Tacstd2      | UG5 tumor-associated calcium signal transducer 2                                                      |
| 2,36375    | 1,0926858  | 0,5463429  | Tacstd2      | UG5 tumor-associated calcium signal transducer 2                                                      |

|            |            |            |         |                                                                      |
|------------|------------|------------|---------|----------------------------------------------------------------------|
| 3,531      | 1,30717737 | 0,65358868 | Twist   | UG5 twist gene homolog, (Drosophila)                                 |
| 3,1665     | 1,15932869 | 0,57966434 | Twist   | UG5 twist gene homolog, (Drosophila)                                 |
| 2,072      | 0,32960684 | 0,16480342 | Tyrobp  | UG5 TYRO protein tyrosine kinase binding protein                     |
| 0,354      | 0,07171471 | 0,03585736 | B4galt6 | UG5 UDP-Gal:betaGlcNAc beta 1,4-galactosyltransferase, polypeptide 6 |
| 0,461      | 0,12803515 | 0,06401758 | Ugdh    | UG5 UDP-glucose dehydrogenase                                        |
| 2,04825    | 0,98615765 | 0,49307883 | Usmg4   | UG5 upregulated during skeletal muscle growth 4                      |
| 2,536      | 1,12779283 | 0,56389641 | Upp     | UG5 uridine phosphorylase                                            |
|            |            |            |         | UG5                                                                  |
| 1,94475    | 0,21445337 | 0,10722669 | Vcl     | vinculin                                                             |
| 1,83375    | 0,73672988 | 0,36836494 | Rala    | UG5 v-ral simian leukemia viral oncogene homolog A (ras related)     |
| 0,678      | 0,47315537 | 0,23657768 | Wdr12   | UG5 WD repeat domain 12                                              |
| 3,32133333 | 0,79079728 | 0,39539864 | Wnt5a   | UG5 wingless-related MMTV integration site 5A                        |
| 2,44       | 0,34333657 | 0,17166828 | Xdh     | UG5 xanthine dehydrogenase                                           |
| 2,0265     | 0,54773077 | 0,27386539 | Lyn     | UG5 Yamaguchi sarcoma viral (v-yes-1) oncogene homolog               |
| 2,2475     | 0,47232228 | 0,23616114 | Lyn     | UG5 Yamaguchi sarcoma viral (v-yes-1) oncogene homolog               |
