# Supplementary material
Source: PubMed Central journal article supplement (PMC2702869)

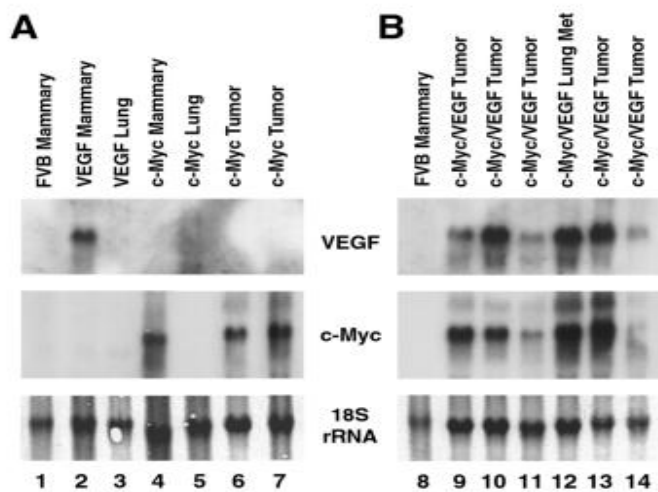

Supplement: NIHMS54948-supplement-S_Figure_1.pdf [file NIHMS54948-supplement-S_Figure_1.pdf]

# Supplementary figures

# Fig. 2

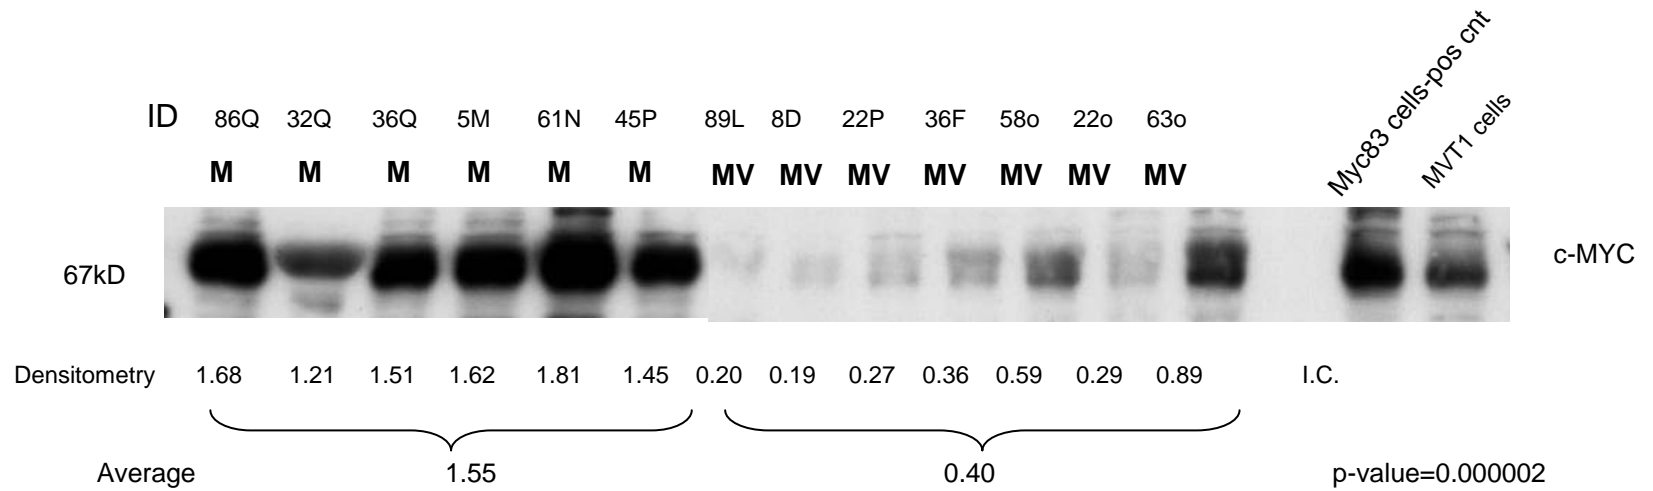

Supplement: NIHMS54948-supplement-S_Figure_2.pdf [file NIHMS54948-supplement-S_Figure_2.pdf]
